# Supplementary material
Source: MDPI journal article supplement (https://www.mdpi.com/2073-4441/15/20/3671)
Supplement: s1 [file s1]

## Supplementary Material

### Effects of Reclaimed Water Irrigation on Grain Quality and Endogenous Estrogen Concentrations of Winter Wheat

Yu Chen <sup>1</sup>, Honglu Liu <sup>2</sup>, Taotao Lu <sup>1</sup>, Yan Li <sup>1\*</sup>, Zhenhao Zheng <sup>3</sup> and Yitong Wang <sup>1</sup>

1 College of Hydraulic Science and Engineering, Yangzhou University, Yangzhou 225009, China

2 Beijing Unconventional Water Resources Development and Utilization and Water Saving Engineering Technology Research Center, Beijing 100048, China;

3 Agricultural Technology Extension Station of Ningbo, Ningbo 315012, China;

#### Corresponding Author

Yan, Li

College of Hydraulic Science and Engineering, Yangzhou University, Yangzhou 225009, China

E-mail: liyan7986@126.com;

Tel.: +86-15252741669.

#### This Supporting Information contains 9 pages, 6 tables.

|                                                                                                  |    |
|--------------------------------------------------------------------------------------------------|----|
| Table S1. Estrogen concentration in topsoil with different irrigation quality in 2015            | 2  |
| Table S2. Estrogen concentration in topsoil with different irrigation quality in 2016            | 3  |
| Table S3. Winter wheat quality index with different irrigation quality in 2015                   | 4  |
| Table S4. Winter wheat quality index with different irrigation quality in 2016                   | 6  |
| Table S5. Estrogen concentration in winter wheat grain with different irrigation quality in 2015 | 8  |
| Table S6. Estrogen concentration in winter wheat grain with different irrigation quality in 2016 | 10 |

Table S1. Estrogen concentration in topsoil with different irrigation quality in 2015

| Treatments      | Number of samples | E1 (mg/kg) | EE2 (mg/kg) | E2 (mg/kg) | E3 (mg/kg) | Sum Content (mg/kg) |
|-----------------|-------------------|------------|-------------|------------|------------|---------------------|
| reclaimed water | 1                 | 0          | ND          | ND         | 0.0023     | 0.0023              |
|                 | 2                 | 0.00319    | ND          | ND         | 0.0024     | 0.0056              |
|                 | 3                 | 0.00066    | ND          | ND         | 0.0035     | 0.0042              |
| alternating     | 1                 | 0          | ND          | ND         | 0.0024     | 0.0024              |
|                 | 2                 | 0.00060    | ND          | ND         | 0.0019     | 0.0025              |
|                 | 3                 | 0          | ND          | ND         | 0.0032     | 0.0032              |
| groundwater     | 1                 | 0.00191    | ND          | ND         | 0.0016     | 0.0035              |
|                 | 2                 | 0.00025    | ND          | ND         | 0.0023     | 0.0025              |
|                 | 3                 | 0          | ND          | ND         | 0.0033     | 0.0033              |

Note: ND represents below the limits of detection; natural estrone (E1), 17 $\beta$ -estradiol (17 $\beta$ -E2) and estriol (E3), and synthetic estrogen (ethinyl estradiol, EE2).

Table S2. Estrogen concentration in topsoil with different irrigation quality in 2016

| Treatments      | Number of samples | E1 (mg/kg) | EE2 (mg/kg) | E2 (mg/kg) | E3 (mg/kg) | Sum Content (mg/kg) |
|-----------------|-------------------|------------|-------------|------------|------------|---------------------|
| reclaimed water | 1                 | 0.00110    | ND          | ND         | 0.0023     | 0.0023              |
|                 | 2                 | 0.00050    | ND          | ND         | 0.0024     | 0.0056              |
|                 | 3                 | 0.00030    | ND          | ND         | 0.0035     | 0.0042              |
| alternating     | 1                 | 0.00046    | ND          | ND         | 0.0024     | 0.0024              |
|                 | 2                 | 0.00025    | ND          | ND         | 0.0019     | 0.0025              |
|                 | 3                 | 0.00021    | ND          | ND         | 0.0032     | 0.0032              |
| groundwater     | 1                 | 0.00031    | ND          | ND         | 0.0016     | 0.0035              |
|                 | 2                 | 0.00027    | ND          | ND         | 0.0023     | 0.0025              |
|                 | 3                 | 0.00053    | ND          | ND         | 0.0033     | 0.0033              |

Note: ND represents below the limits of detection; natural estrone (E1), 17 $\beta$ -estradiol (17 $\beta$ -E2) and estriol (E3), and synthetic estrogen (ethinyl estradiol, EE2).

Table S3. Winter wheat quality index with different irrigation quality in 2015

| Wheat variety | Treatments        | Number of samples | crude protein % | total soluble sugar % | coarse ash % | starch % | reduction-type VC % |
|---------------|-------------------|-------------------|-----------------|-----------------------|--------------|----------|---------------------|
| Jimai22       | reclaimed water   | 1                 | 14.8            | 1.5                   | 2.62         | 59       | 4.11                |
|               |                   | 2                 | 14.2            | 1.39                  | 1.91         | 69       | 14.4                |
|               |                   | 3                 | 12.9            | 1.07                  | 2.73         | 68.6     | 14.4                |
|               | alternating water | 1                 | 13.1            | 2.14                  | 2.84         | 63.3     | 6.16                |
|               |                   | 2                 | 14.2            | 1.46                  | 2.44         | 62.7     | 10.3                |
|               |                   | 3                 | 12.1            | 1.14                  | 2.89         | 70.6     | 10.3                |
|               | groundwater       | 1                 | 13.6            | 1.61                  | 1.91         | 58.3     | 10.3                |
|               |                   | 2                 | 13.4            | 0.86                  | 3.28         | 59.8     | 16.4                |
|               |                   | 3                 | 12.2            | 1.14                  | 2.43         | 75.1     | 16.4                |
| Zhongmai175   | reclaimed water   | 1                 | 13.6            | 1.21                  | 2.25         | 75.7     | 12.3                |
|               |                   | 2                 | 13.7            | 1.07                  | 2.45         | 64.3     | 16.4                |
|               |                   | 3                 | 14.5            | 1.79                  | 1.95         | 70.1     | 12.3                |
|               | alternating water | 1                 | 12.4            | 1.71                  | 2.61         | 76.7     | 16.4                |
|               |                   | 2                 | 13.5            | 1.25                  | 3.04         | 70.3     | 16.4                |
|               |                   | 3                 | 13.2            | 1.5                   | 1.71         | 73       | 12.3                |
|               | groundwater       | 1                 | 12.4            | 1.57                  | 1.77         | 77.3     | 16.4                |
|               |                   | 2                 | 13.6            | 1.93                  | 1.74         | 72.2     | 14.4                |
|               |                   | 3                 | 13              | 1.71                  | 3.27         | 83.5     | 10.3                |
| Shimai15      | reclaimed water   | 1                 | 15              | 2                     | 2.56         | 61.4     | 10.3                |
|               |                   | 2                 | 15.1            | 2.31                  | 3.04         | 63.4     | 7.34                |
|               |                   | 3                 | 15.1            | 0.99                  | 2.41         | 72       | 4.08                |
|               | alternating water | 1                 | 14.6            | 2.32                  | 2.75         | 64.9     | 12.3                |
|               |                   | 2                 | 14.9            | 1.71                  | 3.07         | 70.1     | 5.34                |
|               |                   | 3                 | 15.1            | 1.46                  | 2.47         | 74.5     | 4.08                |
|               | groundwater       | 1                 | 14.5            | 1.96                  | 4.88         | 62.6     | 6.12                |
|               |                   | 2                 | 14.8            | 2.21                  | 2.06         | 68       | 4.08                |
|               |                   | 3                 | 15              | 1.89                  | 2.39         | 59.4     | 6.12                |
| Nongda211     | reclaimed water   | 1                 | 14.8            | 1.42                  | 1.96         | 75.9     | 6.94                |
|               |                   | 2                 | 13.2            | 2.21                  | 2.04         | 68.7     | 5.71                |
|               |                   | 3                 | 12.9            | 2.74                  | 1.81         | 67.2     | 4.08                |
|               | alternating water | 1                 | 13.3            | 1.39                  | 3.47         | 72.8     | 5.3                 |
|               |                   | 2                 | 12.6            | 1.78                  | 2.99         | 74.1     | 6.12                |
|               |                   | 3                 | 12.7            | 2.42                  | 2.11         | 75.4     | 4.9                 |
|               | groundwater       | 1                 | 12.7            | 1.32                  | 3.3          | 68.7     | 4.49                |
|               |                   | 2                 | 12.8            | 1.86                  | 2.37         | 62.4     | 5.3                 |
|               |                   | 3                 | 12              | 2.85                  | 1.88         | 78.8     | 4.9                 |
| Shifu 20      | reclaimed water   | 1                 | 13.9            | 2.28                  | 1.76         | 71.1     | 7.34                |
|               |                   | 2                 | 13.8            | 1.32                  | 1.9          | 67.5     | 4.49                |

|                   |   |      |      |      |      |      |
|-------------------|---|------|------|------|------|------|
|                   | 3 | 13.5 | 2.81 | 2.34 | 62.9 | 5.3  |
|                   | 1 | 13.2 | 1.46 | 1.92 | 59.8 | 4.9  |
| alternating water | 2 | 13.8 | 2.67 | 2.38 | 71.4 | 5.71 |
|                   | 3 | 14.2 | 2.31 | 2.2  | 68.3 | 6.12 |
|                   | 1 | 13.5 | 1.89 | 1.78 | 63.5 | 4.08 |
| groundwater       | 2 | 13.2 | 1.92 | 1.96 | 76.9 | 4.08 |
|                   | 3 | 13.8 | 1.46 | 1.81 | 72.8 | 6.94 |

---

Note: ND represents below the limits of detection; natural estrone (E1), 17 $\beta$ -estradiol (17 $\beta$ -E2) and estriol (E3), and synthetic estrogen (ethinyl estradiol, EE2).

Table S4. Winter wheat quality index with different irrigation quality in 2016

| Wheat variety | Treatments        | Number of samples | crude protein % | total soluble sugar % | coarse ash % | starch % | reduction-type VC % |
|---------------|-------------------|-------------------|-----------------|-----------------------|--------------|----------|---------------------|
| Lunxuan518    | reclaimed water   | 1                 | 11.8            | 1.31                  | 2.01         | 68.2     | 5.01                |
|               |                   | 2                 | 12.9            | 0.62                  | 2.5          | 62.4     | 15.8                |
|               |                   | 3                 | 12.8            | 0.69                  | 3.56         | 61.8     | 7.52                |
|               | alternating water | 1                 | 13.2            | 0.77                  | 2.5          | 64       | 12.1                |
|               |                   | 2                 | 13.6            | 0.77                  | 2.69         | 70.6     | 17                  |
|               |                   | 3                 | 13.6            | 1.08                  | 3.46         | 61.7     | 15                  |
|               | groundwater       | 1                 | 12.9            | 1.15                  | 2.19         | 66.7     | 10.2                |
|               |                   | 2                 | 13.2            | 0.62                  | 2.23         | 66.2     | 19.9                |
|               |                   | 3                 | 13.2            | 0.77                  | 3.1          | 64.9     | 7.51                |
| Zhongmai175   | reclaimed water   | 1                 | 12.8            | 0.62                  | 2.68         | 65.2     | 12.2                |
|               |                   | 2                 | 13.5            | 0.92                  | 2.09         | 60.8     | 12.2                |
|               |                   | 3                 | 15.4            | 1.08                  | 2.18         | 62.8     | 10.6                |
|               | alternating water | 1                 | 12.6            | 1.15                  | 2.29         | 64.2     | 19.6                |
|               |                   | 2                 | 13.1            | 0.77                  | 2.18         | 60.7     | 14.8                |
|               |                   | 3                 | 15.3            | 0.79                  | 2.16         | 61       | 12.2                |
|               | groundwater       | 1                 | 13.2            | 0.92                  | 2.1          | 63.7     | 10.4                |
|               |                   | 2                 | 13.5            | 1.27                  | 2.19         | 67       | 7.49                |
|               |                   | 3                 | 15.4            | 1.38                  | 2.29         | 60.6     | 21.9                |
| Shimai15      | reclaimed water   | 1                 | 16.7            | 0.85                  | 3.76         | 61.7     | 7.5                 |
|               |                   | 2                 | 16.6            | 1.15                  | 2.33         | 60       | 5.4                 |
|               |                   | 3                 | 15.8            | 1.08                  | 3.06         | 66.4     | 14.8                |
|               | alternating water | 1                 | 16.4            | 1.23                  | 3.27         | 65.4     | 12.3                |
|               |                   | 2                 | 15.4            | 0.85                  | 3.6          | 62.7     | 5.3                 |
|               |                   | 3                 | 15.7            | 0.85                  | 2.96         | 58.8     | 10.2                |
|               | groundwater       | 1                 | 15.3            | 1.08                  | 3.07         | 67.2     | 10.4                |
|               |                   | 2                 | 15.2            | 1                     | 3.05         | 61.7     | 5.2                 |
|               |                   | 3                 | 15.4            | 1                     | 3.22         | 55.6     | 16.5                |
| Nongda211     | reclaimed water   | 1                 | 16.4            | 0.85                  | 2.63         | 59.8     | 7.5                 |
|               |                   | 2                 | 16.3            | 1.31                  | 2.61         | 65.4     | 7.8                 |
|               |                   | 3                 | 15.6            | 1.15                  | 2.96         | 59.9     | 16.8                |

|         |                   |   |      |      |      |      |      |
|---------|-------------------|---|------|------|------|------|------|
| Shifu20 | alternating water | 1 | 16   | 1    | 3.41 | 62   | 7.6  |
|         |                   | 2 | 16.2 | 1    | 3.51 | 63.5 | 10.4 |
|         |                   | 3 | 15.5 | 1.23 | 2.61 | 61.3 | 15   |
|         | groundwater       | 1 | 15.5 | 1.15 | 3.95 | 61   | 7.4  |
|         |                   | 2 | 16.1 | 1.08 | 2.66 | 63.7 | 12.2 |
|         |                   | 3 | 15.1 | 0.77 | 2.24 | 60.2 | 11.9 |
|         | reclaimed water   | 1 | 16.4 | 1.08 | 2.27 | 59.8 | 10.2 |
|         |                   | 2 | 16.1 | 1    | 2.09 | 65.2 | 10.3 |
|         |                   | 3 | 15.5 | 0.77 | 2.27 | 59.8 | 9.1  |
|         | alternating water | 1 | 15.9 | 0.85 | 2.44 | 62.2 | 10.3 |
|         |                   | 2 | 15.4 | 1.15 | 2.31 | 63.2 | 16.6 |
|         |                   | 3 | 14.8 | 1.31 | 3.16 | 60.8 | 9.5  |
|         | groundwater       | 1 | 15.4 | 0.85 | 2.71 | 63.7 | 14.9 |
|         |                   | 2 | 14.4 | 1.08 | 2.7  | 61.3 | 12.4 |
|         |                   | 3 | 15.4 | 1.28 | 2.33 | 59.5 | 20.8 |

---

Note: ND represents below the limits of detection; natural estrone (E1), 17 $\beta$ -estradiol (17 $\beta$ -E2) and estriol (E3), and synthetic estrogen (ethinyl estradiol, EE2).

Table S5. Estrogen concentration in winter wheat grain with different irrigation quality in 2015

| Wheat Variety | Treatments      | Number of samples | E1 (ug/kg) | EE2 (ug/kg) | E2 (ug/kg) | E3 (ug/kg) | Sum (ug/kg) |
|---------------|-----------------|-------------------|------------|-------------|------------|------------|-------------|
| Jimai 22      | reclaimed water | 1                 | 0.01037    | ND          | ND         | ND         | 10.37       |
|               |                 | 2                 | 0          | ND          | ND         | ND         | 0           |
|               |                 | 3                 | 0.00077    | ND          | ND         | ND         | 0.77        |
|               | alternating     | 1                 | 0.00061    | ND          | ND         | ND         | 0.61        |
|               |                 | 2                 | 0          | ND          | ND         | ND         | 0           |
|               |                 | 3                 | 0          | ND          | ND         | ND         | 0           |
|               | groundwater     | 1                 | 0.0015     | ND          | ND         | ND         | 1.5         |
|               |                 | 2                 | 0          | ND          | ND         | ND         | 0           |
|               |                 | 3                 | 0.00039    | ND          | ND         | ND         | 0.39        |
| Zhongmai 175  | reclaimed water | 1                 | 0          | ND          | ND         | ND         | 0           |
|               |                 | 2                 | 0.00035    | ND          | ND         | ND         | 0.35        |
|               |                 | 3                 | 0          | ND          | ND         | ND         | 0           |
|               | alternating     | 1                 | 0.00692    | ND          | ND         | ND         | 6.92        |
|               |                 | 2                 | 0          | ND          | ND         | ND         | 0           |
|               |                 | 3                 | 0.00093    | ND          | ND         | ND         | 0.93        |
|               | groundwater     | 1                 | 0          | ND          | ND         | ND         | 0           |
|               |                 | 2                 | 0          | ND          | ND         | ND         | 0           |
|               |                 | 3                 | 0          | ND          | ND         | ND         | 0           |
| Shimai 15     | reclaimed water | 1                 | 0          | ND          | ND         | ND         | 0           |
|               |                 | 2                 | 0.00079    | ND          | ND         | ND         | 0.79        |
|               |                 | 3                 | 0          | ND          | ND         | ND         | 0           |
|               | alternating     | 1                 | 0.00137    | ND          | ND         | ND         | 1.37        |
|               |                 | 2                 | 0.00049    | ND          | ND         | ND         | 0.49        |
|               |                 | 3                 | 0.00057    | ND          | ND         | ND         | 0.57        |
|               | groundwater     | 1                 | 0.00058    | ND          | ND         | ND         | 0.58        |
|               |                 | 2                 | 0.00198    | ND          | ND         | ND         | 1.98        |
|               |                 | 3                 | 0.00126    | ND          | ND         | ND         | 1.26        |
| Nongda 211    | reclaimed water | 1                 | 0          | ND          | ND         | ND         | 0           |
|               |                 | 2                 | 0.00042    | ND          | ND         | ND         | 0.42        |
|               |                 | 3                 | 0          | ND          | ND         | ND         | 0           |
|               | alternating     | 1                 | 0.00129    | ND          | ND         | ND         | 1.29        |
|               |                 | 2                 | 0.0005     | ND          | ND         | ND         | 0.5         |
|               |                 | 3                 | 0.00092    | ND          | ND         | ND         | 0.92        |



|          |                    |   |         |    |    |    |      |
|----------|--------------------|---|---------|----|----|----|------|
| Shifu 20 | groundwater        | 1 | 0.00093 | ND | ND | ND | 0.93 |
|          |                    | 2 | 0       | ND | ND | ND | 0    |
|          |                    | 3 | 0       | ND | ND | ND | 0    |
|          | reclaimed<br>water | 1 | 0       | ND | ND | ND | 0    |
|          |                    | 2 | 0       | ND | ND | ND | 0    |
|          |                    | 3 | 0       | ND | ND | ND | 0    |
|          | alternating        | 1 | 0.00131 | ND | ND | ND | 1.31 |
|          |                    | 2 | 0       | ND | ND | ND | 0    |
|          |                    | 3 | 0.00133 | ND | ND | ND | 1.33 |
|          | groundwater        | 1 | 0       | ND | ND | ND | 0    |
|          |                    | 2 | 0.00101 | ND | ND | ND | 1.01 |
|          |                    | 3 | 0.00318 | ND | ND | ND | 3.18 |

---

Note: ND represents below the limits of detection; natural estrone (E1), 17 $\beta$ -estradiol (17 $\beta$ -E2) and estriol (E3), and synthetic estrogen (ethinyl estradiol, EE2).

Table S6. Estrogen concentration in winter wheat grain with different irrigation quality in 2016

| Wheat Variety | Treatments      | Number of samples | E1 (ug/kg) | EE2 (ug/kg) | E2 (ug/kg) | E3 (ug/kg) | Sum (ug/kg) |
|---------------|-----------------|-------------------|------------|-------------|------------|------------|-------------|
| Jimai 22      | reclaimed water | 1                 | 0.00052    | ND          | ND         | 0.00000    | 0.52        |
|               |                 | 2                 | 0.00025    | ND          | ND         | 0.00000    | 0.25        |
|               |                 | 3                 | 0.00096    | ND          | ND         | 0.00000    | 0.96        |
|               | alternating     | 1                 | 0.00017    | ND          | ND         | 0.00000    | 0.17        |
|               |                 | 2                 | 0.00022    | ND          | ND         | 0.00000    | 0.22        |
|               |                 | 3                 | 0.00034    | ND          | ND         | 0.00048    | 0.82        |
|               | groundwater     | 1                 | 0.00066    | ND          | ND         | 0.00000    | 0.66        |
|               |                 | 2                 | 0.00043    | ND          | ND         | 0.00000    | 0.43        |
|               |                 | 3                 | 0.00065    | ND          | ND         | 0.00000    | 0.65        |
| Zhongmai 175  | reclaimed water | 1                 | 0.00088    | ND          | ND         | 0.00048    | 1.36        |
|               |                 | 2                 | 0.00060    | ND          | ND         | 0.00000    | 0.60        |
|               |                 | 3                 | 0.00034    | ND          | ND         | 0.00156    | 1.90        |
|               | alternating     | 1                 | 0.00068    | ND          | ND         | 0.00000    | 0.68        |
|               |                 | 2                 | 0.00020    | ND          | ND         | 0.00113    | 1.32        |
|               |                 | 3                 | 0.00000    | ND          | ND         | 0.00000    | 0.00        |
|               | groundwater     | 1                 | 0.00038    | ND          | ND         | 0.00356    | 3.95        |
|               |                 | 2                 | 0.00007    | ND          | ND         | 0.00041    | 0.48        |
|               |                 | 3                 | 0.00014    | ND          | ND         | 0.00203    | 2.17        |

Note: ND represents below the limits of detection; natural estrone (E1), 17 $\beta$ -estradiol (17 $\beta$ -E2) and estriol (E3), and synthetic estrogen (ethinyl estradiol, EE2).
